# Supplementary material for: Haemoglobin concentration and volume of intravenous fluids in septic shock in the ARISE trial
Source: Springer Nature journal article supplement (doi:10.1186/s13054-018-2029-6), 2018-05-03

**Figure S1:** Haemodynamic parameters and urine output at each time point in the cohort study of patients enrolled in the ARISE trial. Data is presented as median and inter-quartile range. N=number of patients with data at each time point.

### Heart Rate

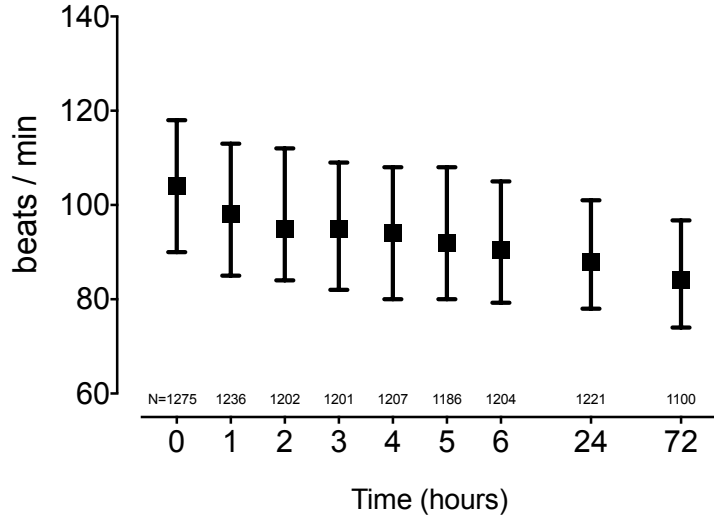

### Systolic Blood Pressure

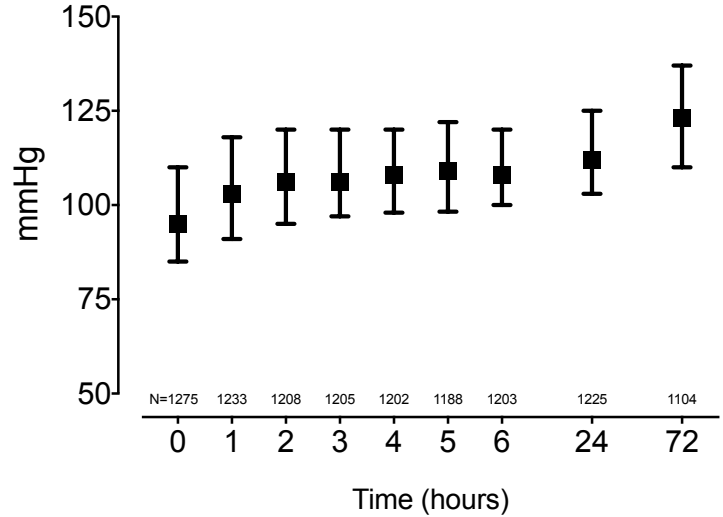

### Central Venous Pressure

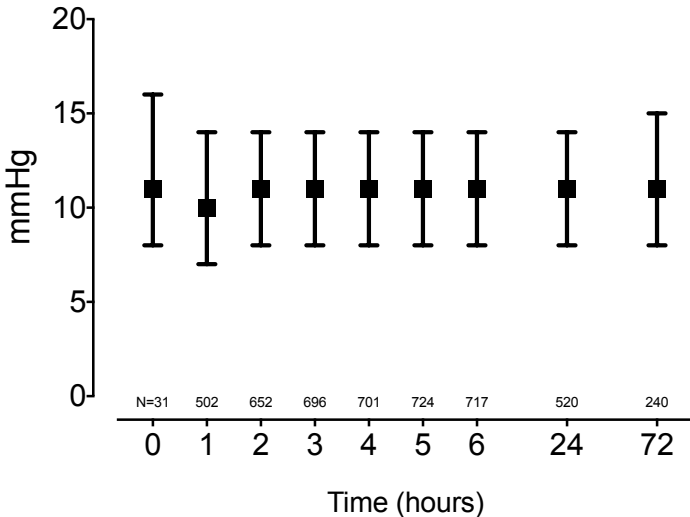

### Urine Output

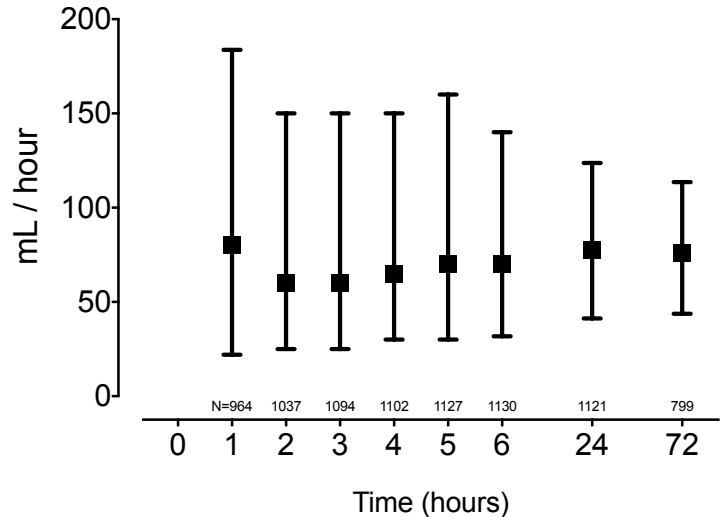

Supplement: MOESM1 [file 15737032]
