# Supplementary material for: Haemoglobin concentration and volume of intravenous fluids in septic shock in the ARISE trial
Source: Springer Nature journal article supplement (doi:10.1186/s13054-018-2029-6), 2018-05-03

**Figure S2:** Haemoglobin concentrations for the cohort at each time point according to ARISE study group. Data is presented as median, boxes as interquartile range and whiskers as range.

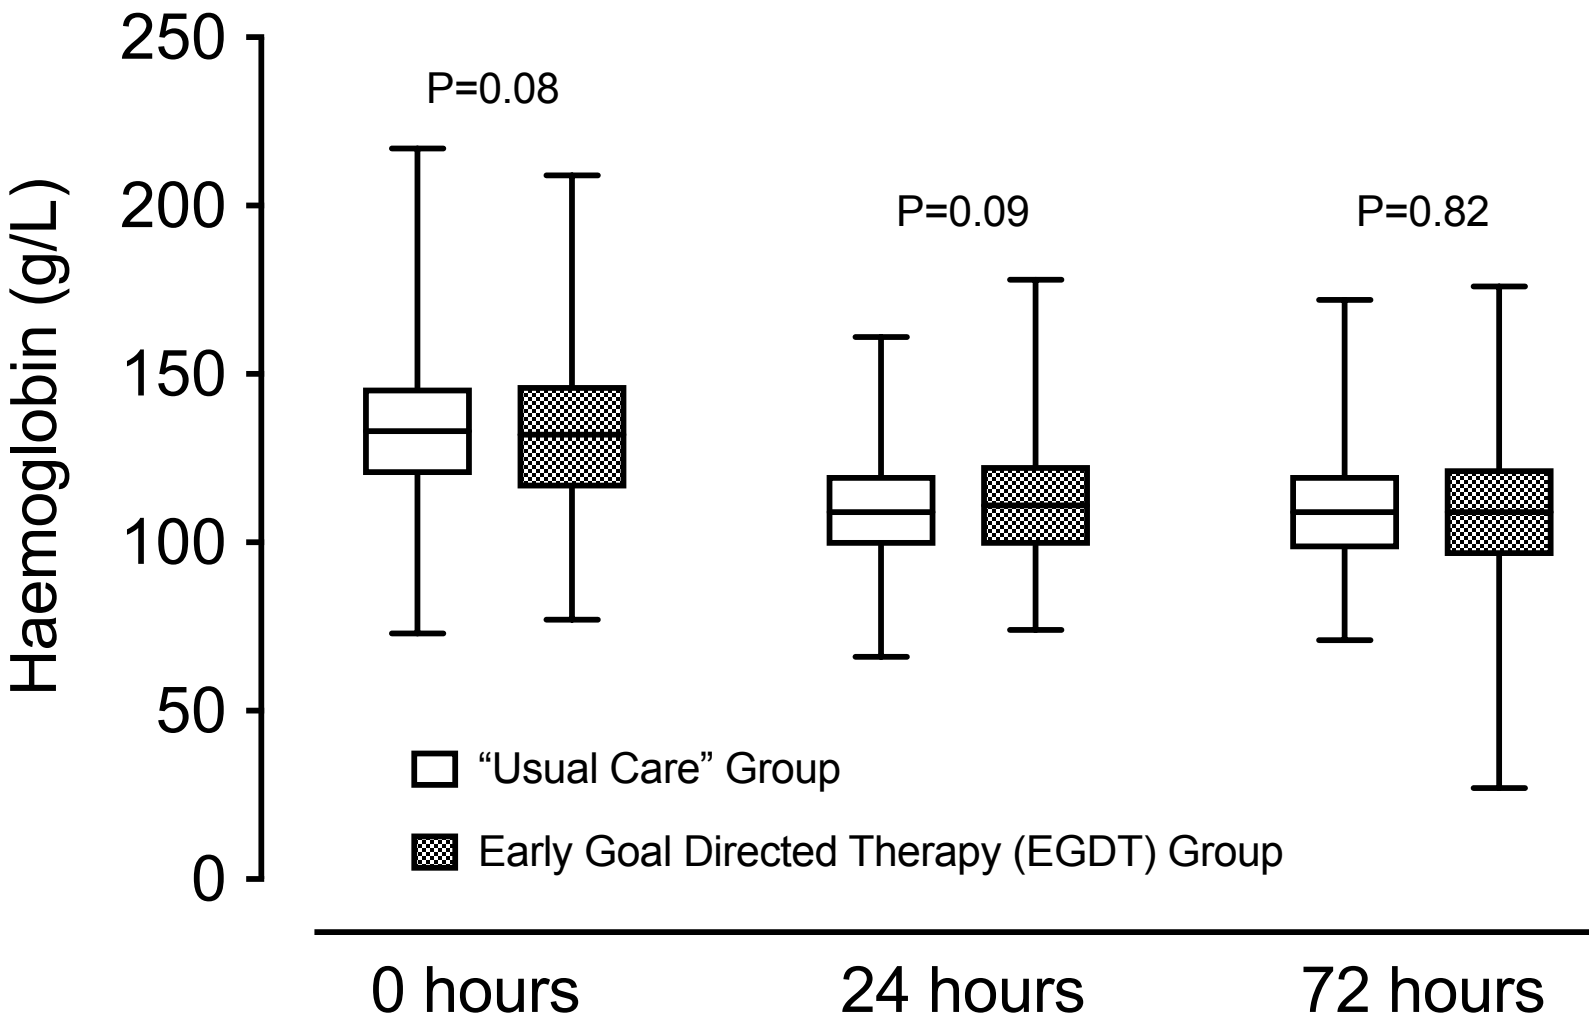

Supplement: MOESM2 [file 15737032]
