# Supplementary material for: Haemoglobin concentration and volume of intravenous fluids in septic shock in the ARISE trial
Source: Springer Nature journal article supplement (doi:10.1186/s13054-018-2029-6), 2018-05-03
Supplement: MOESM3 [file 15737032]

**Table S1:** Association between haemoglobin (Hb) concentration at enrolment into ARISE and subsequent volume of intravenous fluids administered.

|                                                       |                                                                                                                                                                                                                                                                                          |
|-------------------------------------------------------|------------------------------------------------------------------------------------------------------------------------------------------------------------------------------------------------------------------------------------------------------------------------------------------|
| <p><b>Fluid volume administered over 6 hours</b></p>  | <p><u>Univariate analysis</u><br/>5 mL more fluid administered per gram Hb / L<br/><math>R^2 &lt; 1\%</math>, <math>P=0.007</math></p> <p><u>Multivariate Analysis *</u><br/>6 mL more fluid administered per gram Hb / L<br/><math>R^2 = 4.2\%</math>, <math>P&lt;0.001</math></p>      |
| <p><b>Fluid volume administered over 24 hours</b></p> | <p><u>Univariate analysis</u><br/>12 mL more fluid administered per gram Hb / L<br/><math>R^2 = 1.3 \%</math>, <math>P&lt;0.001</math></p> <p><u>Multivariate Analysis #</u><br/>13 mL more fluid administered per gram Hb / L<br/><math>R^2 = 3.8\%</math>, <math>P&lt;0.001</math></p> |
| <p><b>Fluid volume administered over 72 hours</b></p> | <p><u>Univariate analysis</u><br/>18 mL more fluid administered per gram Hb / L<br/><math>R^2 = 1.1 \%</math>, <math>P&lt;0.001</math></p> <p><u>Multivariate Analysis #</u><br/>22 mL more fluid administered per gram Hb / L<br/><math>R^2 = 4.4\%</math>, <math>P&lt;0.001</math></p> |

\* Significant covariates were age, APACHE-II and study group. Complete data was available for 1,205 patients.

# Significant covariates were age and APACHE-II. Complete data was available for 1,245 patients.
