# Supplementary material for: Haemoglobin concentration and volume of intravenous fluids in septic shock in the ARISE trial
Source: Springer Nature journal article supplement (doi:10.1186/s13054-018-2029-6), 2018-05-03

**Figure S3:** Change in haemoglobin concentration vs. volume of intravenous fluid at each hour during the first six hours of resuscitation in a cohort of patients enrolled in the ARISE trial. Data is presented as scatter plots with regression line.

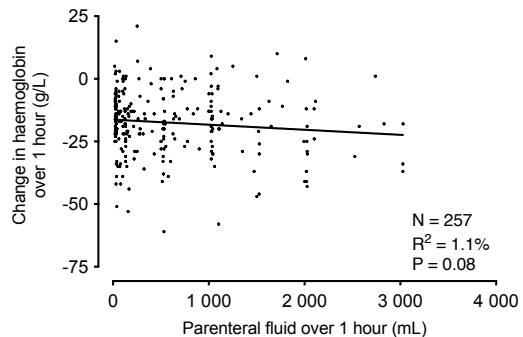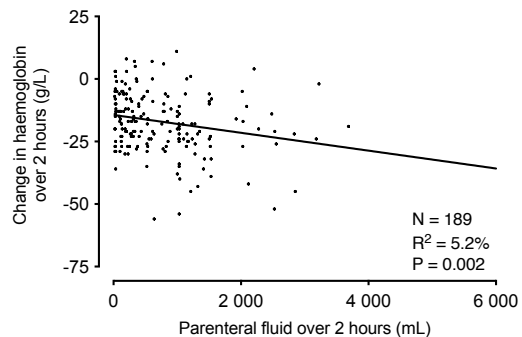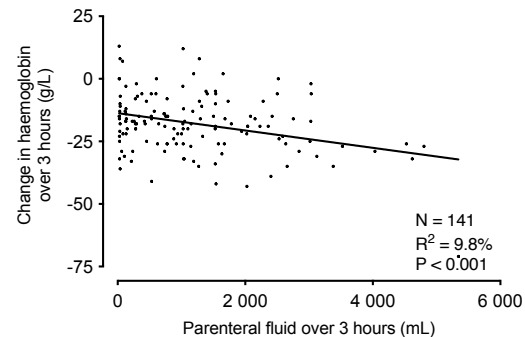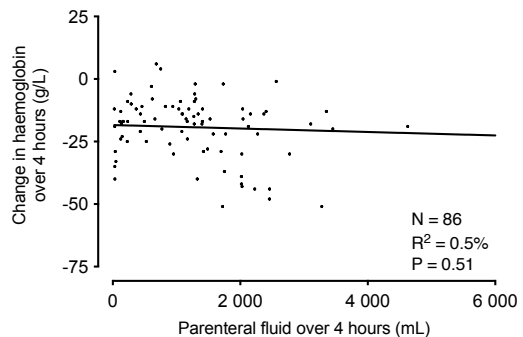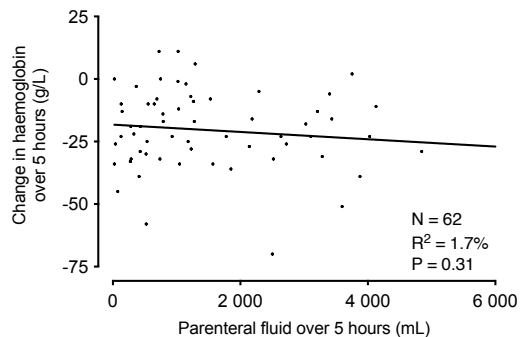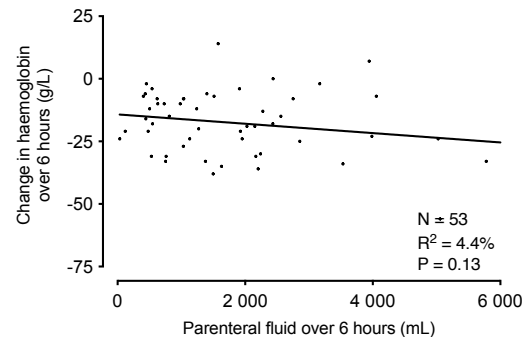

Supplement: MOESM4 [file 15737032]
