# Supplementary material for: Haemoglobin concentration and volume of intravenous fluids in septic shock in the ARISE trial
Source: Springer Nature journal article supplement (doi:10.1186/s13054-018-2029-6), 2018-05-03

**Figure S4:** Change in haemoglobin concentration for the cohort of patients enrolled in the ARISE trial separated according to timing of resuscitation intervention during the first six hours.

**Change in Hb during the 6 hours of resuscitation separated according to timing of arterial line insertion**

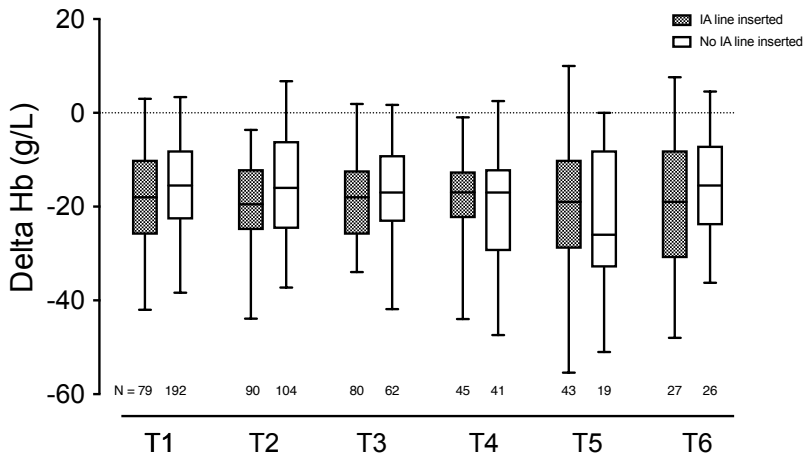

**Change in Hb during the 6 hours of resuscitation separated according to timing of central venous cannulation**

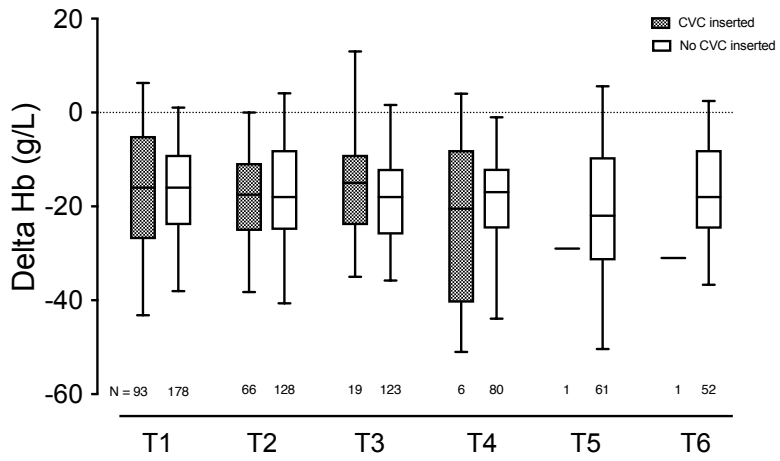

**Change in Hb during the 6 hours of resuscitation separated according to mechanical ventilation**

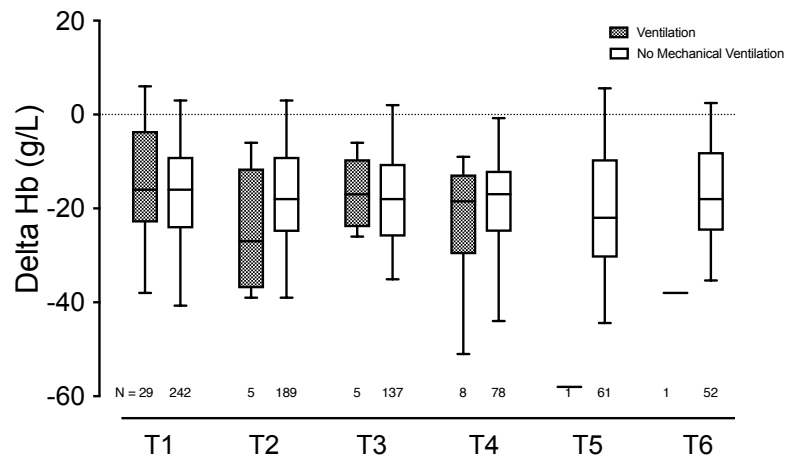

**Change in Hb during the 6 hours of resuscitation separated according to infusion of vasoactive agent**

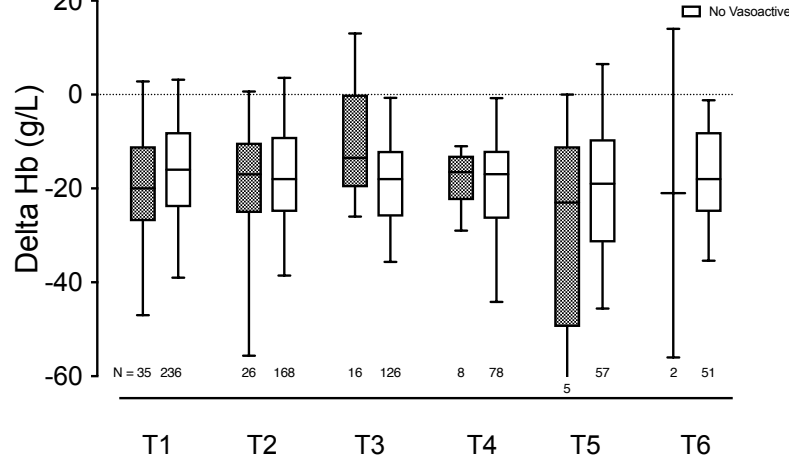

Supplement: MOESM5 [file 15737032]
